1 **Quantifying the roles of vomiting, diarrhea, and residents vs. staff in**  
2 **norovirus transmission in U.S. nursing home outbreaks**

3  
4 Carly Adams<sup>1\*</sup>, David Young<sup>2</sup>, Paul A Gastañaduy<sup>3</sup>, Prbasaj Paul<sup>4</sup>, Zach Marsh<sup>3,5</sup>, Aron J  
5 Hall<sup>3</sup>, Benjamin A Lopman<sup>1</sup>

6  
7 <sup>1</sup> Department of Epidemiology, Rollins School of Public Health, Emory University, Atlanta, GA,  
8 USA

9  
10 <sup>2</sup> South Carolina Department of Health and Environmental Control, Columbia, SC, USA

11  
12 <sup>3</sup> Division of Viral Diseases, National Center for Immunization and Respiratory Diseases,  
13 Centers for Disease Control and Prevention, Atlanta, GA, USA

14  
15 <sup>4</sup> Division of Healthcare Quality Promotion, Centers for Disease Control and Prevention,  
16 Atlanta, GA, USA

17  
18 <sup>5</sup> Oak Ridge Institute for Science and Education, Oak Ridge, Tennessee, USA

19  
20  
21 \* Corresponding author

22 E-mail: [carly.adams@emory.edu](mailto:carly.adams@emory.edu) (CA)

23  
24 BAL conceptualized this study with input from CA. DY provided all outbreak data. CA led the  
25 main study analysis with support from BAL. PAG, PP, ZM, and AJH provided subject matter  
26 expertise and advice regarding epidemiologic methods and data analysis. CA drafted the  
27 manuscript with supervisory input from BAL. All authors reviewed, edited, and approved the  
28 manuscript.

29

30 This work was supported by NIH/NIGMS (R01 GM124280) and by AHRQ (R01 HS025987).

31 The corresponding author had full access to all data in the study and had final responsibility for  
32 the decision to submit for publication.

33

34 Disclaimer: The findings and conclusions in this report are those of the authors and do not  
35 necessarily represent the official position of the Centers for Disease Control and Prevention.

## 36 **Abstract**

37 The role of individual case characteristics, such as symptoms or demographics, in norovirus  
38 transmissibility is poorly understood. Six nursing home norovirus outbreaks occurring in South  
39 Carolina, U.S. from 2014 to 2016 were examined. We aimed to quantify the contribution of  
40 symptoms and other case characteristics in norovirus transmission using the reproduction  
41 number ( $R_{Ei}$ ) as an estimate of individual case infectivity and to examine how transmission  
42 changes over the course of an outbreak. Individual estimates of  $R_{Ei}$  were calculated using a  
43 maximum likelihood procedure to infer the average number of secondary cases generated by  
44 each case. The associations between case characteristics and  $R_{Ei}$  were estimated using a  
45 multivariate mixed linear model. Outbreaks began with one to three index case(s) with large  
46 estimated  $R_{Ei}$ 's (range: 1.48 to 8.70) relative to subsequent cases. Of the 209 cases, 155 (75%)  
47 vomited, 164 (79%) had diarrhea, and 158 (76%) were nursing home residents (vs. staff). Cases  
48 who vomited infected 2.74 (95% CI: 1.90, 3.94) more individuals than non-vomiters, cases with  
49 diarrhea infected 1.62 (95% CI: 1.09, 2.41) more individuals than cases without diarrhea, and  
50 resident-cases infected 1.69 (95% CI: 1.18, 2.42) more individuals than staff-cases. Index cases  
51 tended to be residents (vs. staff) who vomited and infected considerably more secondary cases  
52 compared to non-index cases. Results suggest that individuals, particularly residents, who vomit  
53 are more infectious and tend to drive norovirus transmission in U.S. nursing home norovirus  
54 outbreaks. While diarrhea also plays a role in norovirus transmission, it is to a lesser degree than  
55 vomiting in these settings. Results lend support for prevention and control measures that focus  
56 on cases who vomit, particularly if those cases are residents.

57

## 58 **Author summary**

59 The majority of all norovirus outbreaks reported to the CDC occur in long-term care facilities  
60 (LTCFs), including nursing homes, where older residents are at risk for more severe or  
61 prolonged infection. Because there is currently no publicly available norovirus vaccine, sound  
62 control measures are key to controlling norovirus outbreaks, but there is little evidence that  
63 standard control measures are effective in reducing the size and/or duration of LTCF norovirus  
64 outbreaks. Hence, studies leading to a better understanding of disease spread and prevention of  
65 additional cases, and thus more effective control measures, are needed. To this end, we aimed to  
66 quantify factors associated with norovirus transmission and to examine how transmission  
67 changes over the course of an outbreak. We show that vomiting and, to a lesser extent, diarrhea  
68 are critical in initiating and sustaining norovirus transmission in U.S. nursing home norovirus  
69 outbreaks. We also show that nursing home residents, rather than staff, are the primary drivers of  
70 transmission. Results suggest that control measures focusing on cases who vomit, particularly if  
71 those cases are residents, would be most effective at curtailing norovirus transmission in these  
72 settings.

73

## 74 **Introduction**

75 There are 49.2 million individuals over 65 in the U.S. population (15.2%) and this  
76 population is growing [1]. With nearly half of this age group spending some part of their lives in  
77 nursing homes [2], the number of older adults using paid long-term care services is expected to  
78 grow substantially over the coming decade [3]. In the U.S. and other high-income countries,  
79 gastroenteritis outbreaks are common in long-term care facilities (LTCFs), including nursing  
80 homes [4-7]. Despite the perception that norovirus is a foodborne disease or the ‘cruise ship

81 virus', the majority of all norovirus outbreaks reported to the CDC occur in LTCFs [6]. While  
82 norovirus gastroenteritis is generally mild and self-limiting, older nursing home residents are  
83 vulnerable to infection leading to hospitalization and death [8], with the vast majority of  
84 norovirus-associated deaths in the U.S. occurring among persons aged 65 years and older [9].

85       Norovirus is highly transmissible in nursing homes [10-12], but there is no vaccine or  
86 specific antiviral therapy available to prevent or treat norovirus infection. As a result, rapid  
87 implementation of standard control measures is the mainstay for curtailing transmission [13].  
88 Identifying factors associated with norovirus transmission is critical to better understanding  
89 disease spread and preventing additional cases. Individual-level risk factors for susceptibility to  
90 norovirus infection or severe disease in nursing home outbreaks have been identified, including  
91 resident mobility, dependency on staff assistance [14], immunodeficiency [15], and statin use  
92 [16]. But because transmission of norovirus from one person to another cannot be directly  
93 observed (unlike symptoms and/or positive test results that follow transmission), it remains  
94 poorly understood and the evidence base for the value of specific prevention and control  
95 measures is lacking [10].

96       Statistical algorithms can be used to infer outbreak transmission trees (i.e., who infected  
97 whom) from case onset dates and independent estimates of the serial interval (i.e., the time  
98 between symptom onset in primary cases and the secondary cases they generate) between  
99 generations of case pairs [17]. Individual reproduction numbers ( $R_i$ ), or the number of secondary  
100 cases an individual generates, can then be calculated for all cases. We quantified the contribution  
101 of specific symptoms and residents vs. staff in norovirus transmission by examining the  
102 associations between these variables and individual case infectivity, which was characterized by  
103  $R_i$ . Additionally, we examined how transmission changes over the course of an outbreak. Our

104 overall aim was to inform implementation of effective norovirus prevention and control  
105 measures to reduce the size and duration of norovirus outbreaks in nursing homes. We achieved  
106 this aim by characterizing norovirus transmission in these settings.

107

## 108 **Methods**

### 109 **Outbreak data**

110 De-identified data from six separate and unique nursing home outbreaks from two  
111 consecutive norovirus seasons (2014-2015 and 2015-2016) were provided by the South Carolina  
112 Department of Health and Environmental Control (SCDHEC). All outbreaks were confirmed,  
113 meaning they had at least two laboratory confirmed norovirus cases. Outbreak data were in the  
114 form of line lists and included individual-level information on symptom onset dates, reported  
115 symptoms (vomiting, diarrhea, and fever), age in years, sex, illness duration, hospitalization,  
116 emergency department visit, and whether the case was a resident or staff. Probable cases were  
117 defined as residents or staff who had at least one episode of vomiting and/or three or more loose  
118 stools within a 24-hour period. Confirmed cases were probable cases with a laboratory confirmed  
119 norovirus infection. As this was an analysis of anonymized data that had already been collected  
120 through routine public health response, the Emory University Institutional Review Board (IRB)  
121 determined that this study was exempt from IRB review.

122

### 123 **Estimation of reproduction numbers**

124 Transmissibility of a pathogen can be quantified by its basic reproduction number,  $R_0$ ,  
125 defined as the average number of secondary cases generated by a single infectious individual in a

126 population that is entirely susceptible, or its effective reproduction number,  $R_E$ , defined as the  
127 average number of secondary cases generated by a single infectious individual in a population  
128 that has some level of immunity.  $R_0$  or  $R_E$  of 1 signifies the extinction threshold, below which  
129 each infectious individual, on average, infects less than one other individual and the outbreak  
130 cannot be maintained.  $R_E$  can be converted to  $R_0$  by dividing  $R_E$  by the proportion susceptible in  
131 the population. Estimates for the  $R_0$  of norovirus vary widely, from 1.1 to 7.2, and depend on  
132 differences in settings [18].

133         The primary outcome of interest in this study was individual case infectiousness, which  
134 we measured by estimating the reproduction number,  $R_{Ei}$ , for each case. Here,  $R_{Ei}$  is defined as  
135 the number of secondary cases generated by an individual case  $i$ . We estimated  $R_{Ei}$  using a  
136 maximum likelihood procedure to infer the number of secondary cases generated by each case  
137 [17]. This method, originally described by Wallinga and Teunis, requires only onset dates of all  
138 cases in the outbreak and knowledge of the frequency distribution of the serial interval [17]. We  
139 used a serial interval for norovirus derived from several large norovirus outbreaks in child  
140 daycare centers in Sweden with a gamma probability distribution, mean of 3.6 days, and standard  
141 deviation of 2.0 days [19]. We performed sensitivity analyses with mean serial intervals varying  
142 between 1.5 and 4.0 days in half day increments. Details of the estimation procedure are  
143 available elsewhere [17, 19, 20]. Briefly, this method calculates, in a statistically rigorous  
144 manner, the probability that cases with earlier symptom onset dates infected cases with later  
145 symptom onset dates, selects the probabilities that are greatest using the frequency distribution of  
146 the serial interval, and then, using these probabilities, determines the number of secondary cases  
147 produced by cases with each symptom onset date. Individual cases were assigned a  $R_{Ei}$  based on

148 their symptom onset date, and those with the same onset date within an outbreak were assigned  
149 the same  $R_{Ei}$ .

150 In preliminary analysis, we observed much higher  $R_{Ei}$  for index cases compared to those  
151 on subsequent days. To investigate whether this could indicate heightened infectiousness of  
152 index cases or just the natural decline of the susceptible population, we also calculated  $R_{0i}$  by  
153 dividing  $R_{Ei}$  by the proportion of the population susceptible on day  $i$  ( $p_i$ ) [21]. To calculate the  
154 proportion susceptible, we made the extreme assumptions that all cases were susceptible at the  
155 start of the outbreak and that the final cumulative attack rate was 100%, such that  $p_i = \frac{1 - \sum_0^i C_i}{C}$   
156 where  $C$  is the total number susceptible on day 1 and  $\sum_0^i C_i$  is cumulative incidence to day  $i$ .  
157 Using this approach, we compared estimates of  $R_{0i}$  of index cases on day 1 to  $R_{0i}$  estimated from  
158 cases with onset on days 2 to 4 of the outbreak (excluding days with no reported cases).

159

## 160 **Analyses of risk factors for transmission**

161 We used a linear mixed model to estimate the association between each case  
162 characteristic and  $R_{Ei}$ , while accounting for correlation between  $R_{Ei}$ 's within each outbreak. The  
163 outcome variable was the natural log of  $R_{Ei}$ .

164 The following information was available for cases: symptom onset date, resident/staff  
165 status, age in years, sex, illness duration, hospitalization, emergency department visit, and  
166 presence of diarrhea, vomiting, and fever. Because information on fever, age, sex, emergency  
167 department visit and hospitalization were missing for large percentages of cases (20%, 23%,  
168 26%, 40% and 55%, respectively), we were unable to consider these variables as potential  
169 exposure, confounder, or effect modifying variables in the regression model. Information on



170 resident vs. staff, diarrhea (yes or no), and vomiting (yes or no) were rarely missing (1%, 1%,  
171 and 0%, respectively) and were considered explanatory variables in our model. To account for  
172 clustering induced by correlation of  $R_{Ei}$ 's within the six outbreaks, outbreak number was  
173 included in the model as a random intercept. The full model, with  $\log R_{Ei}$  as the outcome,  
174 included the following explanatory variables: diarrhea, vomiting, resident. The model was  
175 assessed for collinearity and no issues were found. We considered including 'time' in the model  
176 and adjusting for it as a potential confounder, as  $R_{Ei}$  inevitably declines over time. However, we  
177 determined that time cannot be a confounder, since it cannot affect diarrhea, vomiting, or  
178 resident vs. staff, our explanatory variables of interest. The final model is shown below:

179

$$180 \quad \log R_{Eij} = \beta_0 + b_{0i} + \beta_1 \text{Diarrhea}_{ij} + \beta_2 \text{Vomiting}_{ij} + \beta_3 \text{Resident}_{ij} + e_{ij}$$

181

182 where  $\log R_{Eij}$  represents the estimated  $\log R_E$  of the  $j^{\text{th}}$  case from the  $i^{\text{th}}$  outbreak,  $b_{0i}$  represents  
183 the random slope for the  $i^{\text{th}}$  outbreak, and  $e_{ij}$  represents residual heterogeneity of the  $j^{\text{th}}$  case from  
184 the  $i^{\text{th}}$  outbreak not explained by the model. The residual heterogeneity,  $e_{ij}$ , and random slope,  
185  $b_{0j}$ , are assumed to be independent and identically distributed (iid) with mean zero and their  
186 respective variances. Cases from the same outbreak were assigned the same random effect,  
187 whereas cases from different outbreaks were assumed to be independent. Final coefficient  
188 estimates and 95% confidence intervals were exponentiated to show the relationships between  
189 average  $R_{Ei}$  (rather than  $\log R_{Ei}$ ) and the variables in the model.

190 In addition to regression analyses, we also used the Kruskal-Wallis test to compare  $R_{Ei}$ 's  
191 for cases with vomiting vs. no vomiting, diarrhea vs. no diarrhea, both vomiting and diarrhea vs.  
192 vomiting only, and both vomiting and diarrhea vs. diarrhea only. The Kruskal-Wallis test was

193 also used to compare the proportions of vomiting vs. no vomiting, diarrhea vs. no diarrhea, and  
194 residents vs. staff for cases with  $R_{Ei} \geq 1$  to cases with  $R_{Ei} < 1$ .

195 All statistical analyses were performed using SAS software version 9.4 and the *EpiEstim*  
196 [22] package in R software version 3.4.2.

197

## 198 **Exclusion criteria**

199 The original dataset consisted of 209 lab-confirmed and probable cases from six separate  
200 outbreaks. One case was excluded from the estimations of  $R_{Ei}$  and all further analyses because  
201 he/she was missing an illness onset date. After the estimations of  $R_{Ei}$ , four additional cases were  
202 excluded from the regression analyses because they were missing information on diarrhea,  
203 vomiting, and/or resident vs. staff. Lastly, 9 more cases (4.3% of all cases with onset date  
204 information) had symptom onset dates on the last day the outbreak and thus did not produce any  
205 reported secondary cases. Therefore, they had estimated  $R_{Ei}$ 's of zero. Because  $\log R_{Ei}$  could not  
206 be taken for these cases, they were excluded from all regression analyses. Sensitivity analyses  
207 were performed by adding 0.01 to these  $R_{Ei}$  estimates to examine the influence of these cases on  
208 model estimates.

209

## 210 **Results**

211 Across the six outbreaks, the median number of cases was 36.5 (IQR: 28.3, 44.8) and the  
212 median outbreak length was 12 days (IQR: 12.0, 12.8) (Table 1). All cases involved in the  
213 outbreaks were either nursing home residents or staff. The majority of cases were over 80 years  
214 of age (62%), female (74%), nursing home residents (76%), and had diarrhea (with or without  
215 vomiting) (79%), vomiting (with or without diarrhea) (75%), or both diarrhea and vomiting

216 (54%). Of the 9 cases excluded from regression analyses for having  $R_{Ei} = 0$ , 55% were residents,  
 217 55% reported vomiting, and 55% reported diarrhea. All six outbreaks were caused by norovirus  
 218 genogroup II, two of which were confirmed as GII.4 Sydney and four of which were not  
 219 genotyped.

220

221 **Table 1. Characteristics of analyzed nursing home norovirus outbreaks; South Carolina,**  
 222 **2014-2016.**

| Outbreak No.       | Total Cases No. | Lab-confirmed Cases No. | Outbreak Length (in days) <sup>a</sup> | Age (in y) Mean (SD) | Female, No. (%) <sup>b</sup> | Resident, No. (%) <sup>b</sup> | Diarrhea, No. (%) <sup>b</sup> | Vomit, No. (%) <sup>b</sup> |
|--------------------|-----------------|-------------------------|----------------------------------------|----------------------|------------------------------|--------------------------------|--------------------------------|-----------------------------|
| 1                  | 27              | 3                       | 12                                     | 79 (17)              | NA <sup>c</sup>              | 23 (85)                        | 27 (100)                       | 19 (70)                     |
| 2                  | 11              | 4                       | 10                                     | 84 (10)              | 8 (73)                       | 11 (100)                       | 6 (55)                         | 10 (91)                     |
| 3                  | 46              | 4                       | 13                                     | 83 (9)               | 31 (67)                      | 38 (83)                        | 34 (76)                        | 28 (61)                     |
| 4                  | 52              | 4                       | 18                                     | 88 (6)               | 29 (74)                      | 44 (85)                        | 47 (92)                        | 49 (96)                     |
| 5                  | 32              | 4                       | 12                                     | 84 (16)              | 24 (75)                      | 20 (67)                        | 28 (88)                        | 22 (69)                     |
| 6                  | 41              | 4                       | 12                                     | 81 (14)              | 22 (85)                      | 22 (54)                        | 22 (54)                        | 27 (66)                     |
| Total <sup>d</sup> | 208             | 23                      | NA                                     | 83 (12)              | 114 (74)                     | 158 (76)                       | 164 (79)                       | 155 (75)                    |

223 <sup>a</sup>Outbreak length is the difference in days between first illness and last illness onset dates

224 (including the first illness onset date).

225 <sup>b</sup>Percentages were calculated excluding cases with missing information.

226 <sup>c</sup>Information on case sex was not collected for outbreak 1.

227

228 Outbreaks began with one to three index case(s) (nine index cases in total), defined as  
 229 cases with onset of symptoms on day one of an outbreak, that had large estimated  $R_{Ei}$ 's (range:  
 230 1.48 to 8.70) relative to other cases in the outbreak. After the index case(s), each outbreak either  
 231 continuously declined to a  $R_{Ei}$  below 1 or increased again before declining to a  $R_{Ei}$  below 1 (Fig  
 232 1). Of these index cases, at least one from each outbreak reported vomiting (Fig 2). While most  
 233 index cases also reported diarrhea, outbreak 6 began with a case that reported vomiting only.

234

235 **Fig 1. Case counts and individual reproduction numbers,  $R_{Ei}$ , by day in nursing home**

236 **norovirus outbreaks.** From left to right, outbreaks 1-3 and 4-6 are presented on top and bottom,  
237 respectively. Case counts are represented by the gray bars and  $R_{Ei}$  estimates are represented by  
238 the point estimates with corresponding 95% confidence intervals. The horizontal dashed line  
239 signifies a  $R_{Ei}$  of 1, below which each infectious individual, on average, infects less than one  
240 individual and the outbreak cannot be maintained. <sup>a</sup>Infectiousness describes the number of cases  
241 per day (for the gray bars) and  $R_{Ei}$  (for the point estimates); note the change in scale for different  
242 outbreaks. <sup>b</sup>Outbreak day represents the day into the outbreak, with day 1 corresponding to the  
243 first day cases were reported.

244

245 **Fig 2. Distribution of individual reproduction number<sup>a</sup>,  $R_{Ei}$ , frequencies by vomiting<sup>b</sup> with**

246 **index cases outlined in black.** <sup>a</sup>Reproduction number describes the number of secondary cases  
247 generated by an infectious case. <sup>b</sup>Dichotomous variable vomit vs. no vomit.

248

249 When examining  $R_{0i}$  values (calculated from  $R_{Ei}$  estimates), we found that outbreaks had  
250 considerably higher basic reproduction numbers based on the index case(s) ( $R_{0,i} = 6.8, 1.5, 8.4,$   
251  $7.3, 4.6,$  and  $8.7$  for outbreaks 1-6, respectively) compared to the median basic reproduction  
252 number calculated from cases on days 2 to 4 (median  $R_{0,2-4} = 1.7$ ; IQR: 1.6, 2.0).

253 Cases with vomiting (with or without diarrhea) had a greater median  $R_{Ei}$  (0.54; IQR:  
254 0.21, 1.01) than those without vomiting (0.36; IQR: 0.20, 1.47; p-value = 0.0009). Cases with  
255 diarrhea (with or without vomiting) had a similar median  $R_{Ei}$  (0.45; IQR: 0.20, 1.01) to those  
256 without diarrhea (0.47; IQR: 0.27, 0.82; p-value = 0.88). Cases with both vomiting and diarrhea

257 had a greater median  $R_{Ei}$  (0.78; IQR: 0.21, 1.03) than those with diarrhea alone (0.36; IQR: 0.20,  
258 0.47; p-value = 0.002) or vomiting alone (0.47; IQR: 0.27, 0.97; p-value = 0.24). Similarly,  
259 residents had a slightly greater median  $R_{Ei}$  (0.47; IQR: 0.21, 1.01) than staff (0.40; IQR: 0.21,  
260 0.97; p-value = 0.11). Because all outbreaks ended, the overall median  $R_{Ei}$  for all cases was less  
261 than 1 (0.47; IQR: 0.21, 1.01). Similarly, the median  $R_{Ei}$  values for each outbreak were also less  
262 than 1, ranging from 0.40 to 0.63.

263 A total of 63 cases (30% of all cases) had an estimated  $R_{Ei}$  greater than 1, of which 89%  
264 reported vomiting, 83% reported diarrhea, and 86% were residents. Among the remaining 145  
265 cases (70% of all cases) with an estimated  $R_{Ei}$  of less than 1, 68% reported vomiting, 77%  
266 reported diarrhea, and 71% were residents. These differences were significant for vomiting (p-  
267 value = 0.001) but not diarrhea (p-value = 0.23) or resident/staff status (p-value = 0.06). All  
268 index cases had  $R_{Ei}$ 's greater than 1 (median: 4.60; IQR: 1.48, 7.13).

269 In the final multivariable model, cases who vomited infected 2.74 (95% CI: 1.90, 3.94)  
270 more individuals than non-vomiters, cases with diarrhea infected 1.62 (95% CI: 1.09, 2.41) more  
271 individuals than cases without diarrhea, and resident-cases infected 1.69 (95% CI: 1.18, 2.42)  
272 more individuals than staff-cases (Fig 3). In sensitivity analyses where cases with  $R_{Ei} = 0$  were  
273 included in the regression analysis, stronger associations between infectiousness and vomiting,  
274 diarrhea, and resident/staff status were observed (2.96, 1.90, and 1.89, respectively). Adding a  
275 dichotomous variable (index vs. non-index case) to the model indicated that index cases infected  
276 6.64 (95% CI: 3.49, 12.63) more individuals than non-index cases, holding resident vs. staff,  
277 diarrhea, and vomiting constant. Furthermore, we examined the associations between outbreak  
278 day, counting the first illness onset date as day one, and case characteristics and found cases who  
279 vomited occurred 2.7 (95% CI: 1.8, 3.6) days earlier in the outbreak than cases who did not

280 vomit, cases with diarrhea occurred 2.2 (95% CI: 1.2, 3.2) days earlier in the outbreak than cases  
281 without diarrhea, and resident-cases occurred 1.6 (95% CI: 0.8, 2.5) days earlier in the outbreak  
282 compared to staff-cases.

283 In sensitivity analyses to examine the effect of using different norovirus serial intervals  
284 (serial intervals shorter and longer than 3.6 days) when calculating  $R_{Ei}$ , we found that  
285 associations between vomiting and  $R_{Ei}$  and, to a lesser degree, resident and  $R_{Ei}$  increased as the  
286 serial interval increased. The association between diarrhea and  $R_{Ei}$  did not appear to change when  
287 the assumption about serial interval length was changed (Fig 3).

288

### 289 **Fig 3. Associations between individual reproduction numbers, $R_{Ei}$ , and**

290 **symptoms/characteristics of norovirus cases by serial interval length<sup>a</sup>.** <sup>a</sup>The serial interval  
291 length used in the final regression analysis is shown in black. <sup>b</sup>Associations were estimated using  
292 a linear mixed regression model with a random slope for outbreak number and the following  
293 dichotomous predictor variables: vomiting (vs. no vomiting), diarrhea (vs. no diarrhea), and  
294 resident (vs. staff). <sup>c</sup>Estimates from the model were exponentiated and indicate the number of  
295 secondary cases produced by a single primary case comparing: cases with vomiting to cases with  
296 no vomiting, cases with diarrhea to cases with no diarrhea, and resident-cases to staff-cases.  
297 <sup>d</sup>Estimates using a serial interval of 1.0 with a standard deviation of 2.0 (or 1.0) were unstable  
298 and therefore not reported

299

## 300 **Discussion**

301 We inferred who infected whom from outbreak line lists and investigated risk factors for  
302 transmission of norovirus in nursing home outbreaks, leading to several important findings. First,

303 vomiting and, to a lesser degree, diarrhea play a critical role in norovirus transmission in these  
304 settings. Second, outbreaks tend to start with one or more cases who infect substantially more  
305 individuals than later cases in the outbreak. Third, residents, rather than staff, are the primary  
306 drivers of transmission. Our findings are based on data from multiple outbreaks affecting a  
307 considerable number of cases. The novel application of our modeling methods to estimate  
308 reproduction numbers required few assumptions regarding norovirus transmission. Additionally,  
309 our findings were generally robust to assumptions about the serial interval and  
310 inclusion/exclusion criteria for cases with missing data.

311         While previous studies have found that exposure to vomit is associated with an increased  
312 risk of norovirus infection in nursing home residents and staff [14], and that proximity to a  
313 vomiting event is correlated with higher attack rates [23, 24], this is the first study to find that  
314 individuals, particularly residents, who vomit are more infectious and tend to drive norovirus  
315 transmission in U.S. nursing home outbreaks. Human challenge studies have found that  
316 vomiting, compared to diarrhea, is more likely to result in environmental contamination  
317 potentially leading to transmission through fomites and airborne droplets [25]. In household  
318 norovirus outbreaks, however, primary cases with diarrhea, but not vomiting, have been  
319 associated with higher secondary attack rates [26]. This suggests that the relative importance of  
320 specific symptoms in norovirus transmission may be dependent on the outbreak setting.

321         There is little systematic information available on norovirus introduction into nursing  
322 homes [14]. Outbreak reports have shown that nursing home outbreaks often start with single  
323 index cases [14], however the relative infectiousness of index cases (compared to non-index  
324 cases) has not been examined in these settings. We found that outbreaks tend to start with one or  
325 more cases who infect substantially more individuals compared to later cases. There are multiple

326 possible explanations for this greater infectiousness of index cases. First, as an outbreak  
327 progresses and more individuals become ill and later immune, there is a natural decrease in the  
328 proportion susceptible. However, we found that index cases generally had substantially greater  
329  $R_{Ei}$ 's compared to cases with onset dates only a few days after outbreak initiation, before a  
330 sufficient number of susceptibles could accumulate to explain this pattern. We also found that  
331  $R_{0,1}$  (the basic reproduction number for index cases) tended to be substantially larger than  $R_{0,2-4}$   
332 (the basic reproduction numbers for cases on days 2-4), even under the extreme assumptions that  
333 all individuals were initially susceptible and that the total population consisted only of reported  
334 cases in the outbreak. If the observed declines in  $R_{Ei}$  had been due to a natural decrease in  
335 susceptibles alone, we would expect the calculated  $R_{0i}$  values to remain relatively constant over  
336 time. Therefore, these results suggest that index cases are more infectious than subsequent cases  
337 for reasons other than the natural decreases in susceptibles alone. Second, index cases may have  
338 been more infectious than non-index cases due to intrinsic case characteristics (e.g., vomiting).  
339 Under this hypothesis, the median  $R_{Ei}$  may be  $\sim 1.0$ , meaning that most cases in the outbreak are  
340 only moderately infectious, but a highly infectious case is required to initiate an outbreak [27].  
341 Third, rapid implementation of effective outbreak control measures could curtail transmission.  
342 Lacking data on the timing and type of control measures, we could not explicitly account for this  
343 in our calculations. Results may be due to any one of these explanations, or some combination  
344 thereof.

345 U.S. nursing home residents have an increased risk of norovirus gastroenteritis [8, 14],  
346 but evidence for their relative infectiousness compared to staff was lacking. While staff clearly  
347 can transmit norovirus [12, 14], studies of nosocomial outbreaks in the Netherlands have shown  
348 that symptomatic patients have the largest contribution to virus transmission in those settings



349 [28]. The role of residents (vs. staff) in norovirus transmission in U.S. nursing homes may  
350 depend on the average level of mobility and dependency of residents. If nursing home residents  
351 are generally mobile, self-sufficient, and able to gather in communal rooms, they may be more  
352 likely than staff to contribute to norovirus transmission. We did not have information on  
353 residents' mobility or dependence on nursing care for this study, so were unable to include these  
354 variables in our analyses.

355         We note a number of limitations of our study. First, all analyzed outbreaks took place in  
356 South Carolina, so results may not be generalizable to norovirus outbreaks in nursing homes in  
357 other U.S. states or elsewhere. Nursing home staffing levels vary widely across states [29], as do  
358 infection control training resources and healthcare-associated infection reporting [30]. Second,  
359 the probability model used to estimate  $R_{Ei}$  is built on the following assumptions: transmission of  
360 infection occurs only among reported cases, asymptomatic cases do not play a role in  
361 transmission, and all reported cases are part of the same outbreak. However, for norovirus,  
362 symptomatic cases may go unreported and asymptomatic cases could contribute to transmission.  
363 In particular, underreporting of cases in the early stages of an outbreak could lead to an  
364 overestimate of the infectiousness of index cases. Additionally, some reported cases could be  
365 sporadic or caused by a different etiologic agent. Furthermore, only the date of symptom onset,  
366 not time, was considered when calculating  $R_{Ei}$ 's. Because norovirus has a relatively short  
367 incubation period, it is possible, although unlikely, for primary and secondary cases to have the  
368 same symptom onset date. The method we used to calculate  $R_{Ei}$  assumes that such cases cannot  
369 infect each other. Third, we excluded 9 cases with  $R_{Ei} = 0$  from the regression analyses, however  
370 including them in the main regression analysis only strengthened the associations between all  
371 three predictor variables and infectiousness. The association between vomiting and increased

372 infectiousness remained the strongest. Lastly, we used a serial interval distribution estimated  
373 from household transmission associated with norovirus outbreaks in child daycare centers in  
374 Sweden and assumed a similar serial interval in our U.S. nursing homes. Unlike transmission in  
375 the households, where it was clear that the child daycare center attendee/staff infected others in  
376 the home, identifying transmission pairs in nursing home outbreaks is difficult, precluding direct  
377 estimation of serial intervals in these settings. The true serial interval may be longer or shorter in  
378 nursing homes. Regardless, we found that our main finding of the importance of vomiting in  
379 transmission was robust when using different values of the serial interval.

380       Because there is currently no publicly available norovirus vaccine, sound prevention and  
381 control measures are key to controlling norovirus outbreaks, but the present body of published  
382 literature does not provide an evidence-base for the value of specific measures [10]. These study  
383 results lend support for measures that focus on cases who vomit, particularly if those cases are  
384 residents (vs. staff). Results indicate that rapid response to a vomiting event may be effective in  
385 reducing the size and duration of norovirus outbreaks in nursing home settings, and support  
386 measures that reduce exposure to vomit, such as thorough cleaning and disinfection with a  
387 chlorine-based disinfectant, isolation of the case, and implementing antiemetic treatment after  
388 the first vomiting episode [25]. Information on type and timing of control measures was not  
389 available for this study. Future studies should collect such data and evaluate the effects of  
390 specific control measures using similar analytical methods to the approach used here.

391

## 392 **Conclusions**

393 Vomiting, particularly by residents, drives norovirus transmission in U.S. nursing home  
394 outbreaks. This has implications for prevention and control measure recommendations for  
395 outbreaks in these settings.

396

## 397 **Acknowledgements**

398 Not applicable.

## 399 References

- 400 1. U.S. Census Bureau (2017). The Nation's Older Population Is Still Growing, Census Bureau  
401 Reports. Retrieved from <https://www.census.gov/newsroom/press-releases/2017/cb17-100.html>
- 402 2. Spillman BC, Lubitz J. New estimates of lifetime nursing home use: have patterns of use  
403 changed? *Med Care*. 2002;40(10):965-75. Epub 2002/10/24. doi:  
404 10.1097/01.MLR.0000027365.40102.7A. PubMed PMID: 12395029.
- 405 3. Harris-Kojetin L, Sengupta M, Park-Lee E, Valverde R, Caffrey C, Rome V, et al. Long-Term Care  
406 Providers and services users in the United States: data from the National Study of Long-Term Care  
407 Providers, 2013-2014. *Vital Health Stat 3*. 2016;(38):x-xii; 1-105. Epub 2016/03/31. PubMed PMID:  
408 27023287.
- 409 4. Kambhampati A, Koopmans M, Lopman BA. Burden of norovirus in healthcare facilities and  
410 strategies for outbreak control. *J Hosp Infect*. 2015;89(4):296-301. Epub 2015/03/03. doi:  
411 10.1016/j.jhin.2015.01.011. PubMed PMID: 25726433; PubMed Central PMCID: PMC4668703.
- 412 5. Hall AJ, Wikswo ME, Manikonda K, Roberts VA, Yoder JS, Gould LH. Acute gastroenteritis  
413 surveillance through the National Outbreak Reporting System, United States. *Emerg Infect Dis*.  
414 2013;19(8):1305-9. Epub 2013/07/24. doi: 10.3201/eid1908.130482. PubMed PMID: 23876187; PubMed  
415 Central PMCID: PMC3739540.
- 416 6. Wikswo ME, Kambhampati A, Shioda K, Walsh KA, Bowen A, Hall AJ, et al. Outbreaks of Acute  
417 Gastroenteritis Transmitted by Person-to-Person Contact, Environmental Contamination, and Unknown  
418 Modes of Transmission--United States, 2009-2013. *MMWR Surveill Summ*. 2015;64(12):1-16. Epub  
419 2015/12/15. doi: 10.15585/mmwr.mm6412a1. PubMed PMID: 26656915.
- 420 7. Lopman B, Vennema H, Kohli E, Pothier P, Sanchez A, Negredo A, et al. Increase in viral  
421 gastroenteritis outbreaks in Europe and epidemic spread of new norovirus variant. *Lancet*.  
422 2004;363(9410):682-8. Epub 2004/03/06. doi: 10.1016/S0140-6736(04)15641-9. PubMed PMID:  
423 15001325.
- 424 8. Trivedi TK, DeSalvo T, Lee L, Palumbo A, Moll M, Curns A, et al. Hospitalizations and mortality  
425 associated with norovirus outbreaks in nursing homes, 2009-2010. *JAMA*. 2012;308(16):1668-75. Epub  
426 2012/10/20. doi: 10.1001/jama.2012.14023. PubMed PMID: 23079758.
- 427 9. Cardemil CV, Parashar UD, Hall AJ. Norovirus Infection in Older Adults: Epidemiology, Risk  
428 Factors, and Opportunities for Prevention and Control. *Infect Dis Clin North Am*. 2017;31(4):839-70.  
429 Epub 2017/09/16. doi: 10.1016/j.idc.2017.07.012. PubMed PMID: 28911830.
- 430 10. Harris JP, Lopman BA, O'Brien SJ. Infection control measures for norovirus: a systematic review  
431 of outbreaks in semi-enclosed settings. *J Hosp Infect*. 2010;74(1):1-9. Epub 2009/10/13. doi:  
432 10.1016/j.jhin.2009.07.025. PubMed PMID: 19819586.
- 433 11. Iturriza-Gomara M, Lopman B. Norovirus in healthcare settings. *Curr Opin Infect Dis*.  
434 2014;27(5):437-43. Epub 2014/08/08. doi: 10.1097/QCO.000000000000094. PubMed PMID: 25101555;  
435 PubMed Central PMCID: PMC4154788.
- 436 12. Friesema IH, Vennema H, Heijne JC, de Jager CM, Morroy G, van den Kerkhof JH, et al. Norovirus  
437 outbreaks in nursing homes: the evaluation of infection control measures. *Epidemiol Infect*.  
438 2009;137(12):1722-33. Epub 2009/05/12. doi: 10.1017/S095026880900274X. PubMed PMID: 19426572.
- 439 13. Chen Y, Hall AJ, Kirk MD. Norovirus Disease in Older Adults Living in Long-Term Care Facilities:  
440 Strategies for Management. *Curr Geriatr Rep*. 2017;6(1):26-33. Epub 2017/12/06. doi: 10.1007/s13670-  
441 017-0195-z. PubMed PMID: 29204334; PubMed Central PMCID: PMC5709813.
- 442 14. Petrignani M, van Beek J, Borsboom G, Richardus JH, Koopmans M. Norovirus introduction  
443 routes into nursing homes and risk factors for spread: a systematic review and meta-analysis of

- 444 observational studies. *J Hosp Infect.* 2015;89(3):163-78. Epub 2015/01/21. doi:  
445 10.1016/j.jhin.2014.11.015. PubMed PMID: 25601744.
- 446 15. Kaufman SS, Green KY, Korba BE. Treatment of norovirus infections: moving antivirals from the  
447 bench to the bedside. *Antiviral Res.* 2014;105:80-91. Epub 2014/03/04. doi:  
448 10.1016/j.antiviral.2014.02.012. PubMed PMID: 24583027; PubMed Central PMCID: PMCPMC4793406.
- 449 16. Rondy M, Koopmans M, Rotsaert C, Van Loon T, Beljaars B, Van Dijk G, et al. Norovirus disease  
450 associated with excess mortality and use of statins: a retrospective cohort study of an outbreak  
451 following a pilgrimage to Lourdes. *Epidemiol Infect.* 2011;139(3):453-63. Epub 2010/05/25. doi:  
452 10.1017/S0950268810000993. PubMed PMID: 20492742.
- 453 17. Wallinga J, Teunis P. Different epidemic curves for severe acute respiratory syndrome reveal  
454 similar impacts of control measures. *Am J Epidemiol.* 2004;160(6):509-16. Epub 2004/09/09. doi:  
455 10.1093/aje/kwh255. PubMed PMID: 15353409.
- 456 18. Gaythorpe KAM, Trotter CL, Lopman B, Steele M, Conlan AJK. Norovirus transmission dynamics:  
457 a modelling review. *Epidemiol Infect.* 2018;146(2):147-58. Epub 2017/12/23. doi:  
458 10.1017/S0950268817002692. PubMed PMID: 29268812; PubMed Central PMCID: PMCPMC5851036.
- 459 19. Heijne JC, Teunis P, Morroy G, Wijkmans C, Oostveen S, Duizer E, et al. Enhanced hygiene  
460 measures and norovirus transmission during an outbreak. *Emerg Infect Dis.* 2009;15(1):24-30. Epub  
461 2009/01/01. doi: 10.3201/eid1501.080299. PubMed PMID: 19116045; PubMed Central PMCID:  
462 PMCPMC2660689.
- 463 20. Cori A, Ferguson NM, Fraser C, Cauchemez S. A new framework and software to estimate time-  
464 varying reproduction numbers during epidemics. *Am J Epidemiol.* 2013;178(9):1505-12. Epub  
465 2013/09/18. doi: 10.1093/aje/kwt133. PubMed PMID: 24043437; PubMed Central PMCID:  
466 PMCPMC3816335.
- 467 21. Massad E. *Globl Health Informatics* 2017.
- 468 22. Cori A. EpiEstim: a package to estimate time varying reproduction numbers from epidemic  
469 curves. . R package version 11-2. 2013.
- 470 23. Evans MR, Meldrum R, Lane W, Gardner D, Ribeiro CD, Gallimore CI, et al. An outbreak of viral  
471 gastroenteritis following environmental contamination at a concert hall. *Epidemiol Infect.*  
472 2002;129(2):355-60. Epub 2002/10/31. PubMed PMID: 12403111; PubMed Central PMCID:  
473 PMCPMC2869894.
- 474 24. Marks PJ, Vipond IB, Carlisle D, Deakin D, Fey RE, Caul EO. Evidence for airborne transmission of  
475 Norwalk-like virus (NLV) in a hotel restaurant. *Epidemiol Infect.* 2000;124(3):481-7. Epub 2000/09/12.  
476 PubMed PMID: 10982072; PubMed Central PMCID: PMCPMC2810934.
- 477 25. Kirby AE, Streby A, Moe CL. Vomiting as a Symptom and Transmission Risk in Norovirus Illness:  
478 Evidence from Human Challenge Studies. *PLoS One.* 2016;11(4):e0143759. Epub 2016/04/27. doi:  
479 10.1371/journal.pone.0143759. PubMed PMID: 27116105; PubMed Central PMCID: PMCPMC4845978.
- 480 26. Marsh ZA, Grytdal SP, Beggs JC, Leshem E, Gastanaduy PA, Rha B, et al. The unwelcome  
481 houseguest: secondary household transmission of norovirus. *Epidemiol Infect.* 2018;146(2):159-67.  
482 Epub 2017/12/13. doi: 10.1017/S0950268817002783. PubMed PMID: 29229009; PubMed Central  
483 PMCID: PMCPMC5906790.
- 484 27. Lloyd-Smith JO, Schreiber SJ, Kopp PE, Getz WM. Superspreading and the effect of individual  
485 variation on disease emergence. *Nature.* 2005;438(7066):355-9. Epub 2005/11/18. doi:  
486 10.1038/nature04153. PubMed PMID: 16292310.
- 487 28. Sukhrie FH, Teunis P, Vennema H, Copra C, Thijs Beersma MF, Bogerman J, et al. Nosocomial  
488 transmission of norovirus is mainly caused by symptomatic cases. *Clin Infect Dis.* 2012;54(7):931-7. Epub  
489 2012/02/01. doi: 10.1093/cid/cir971. PubMed PMID: 22291099.

- 490 29. Harrington C, Kovner C, Mezey M, Kayser-Jones J, Burger S, Mohler M, et al. Experts recommend  
491 minimum nurse staffing standards for nursing facilities in the United States. *Gerontologist*. 2000;40(1):5-  
492 16. Epub 2000/04/06. PubMed PMID: 10750309.
- 493 30. Cohen CC, Engberg J, Herzig CT, Dick AW, Stone PW. Nursing Homes in States with Infection  
494 Control Training or Infection Reporting Have Reduced Infection Control Deficiency Citations. *Infect  
495 Control Hosp Epidemiol*. 2015;36(12):1475-6. Epub 2015/09/10. doi: 10.1017/ice.2015.214. PubMed  
496 PMID: 26350287; PubMed Central PMCID: PMC4658225.

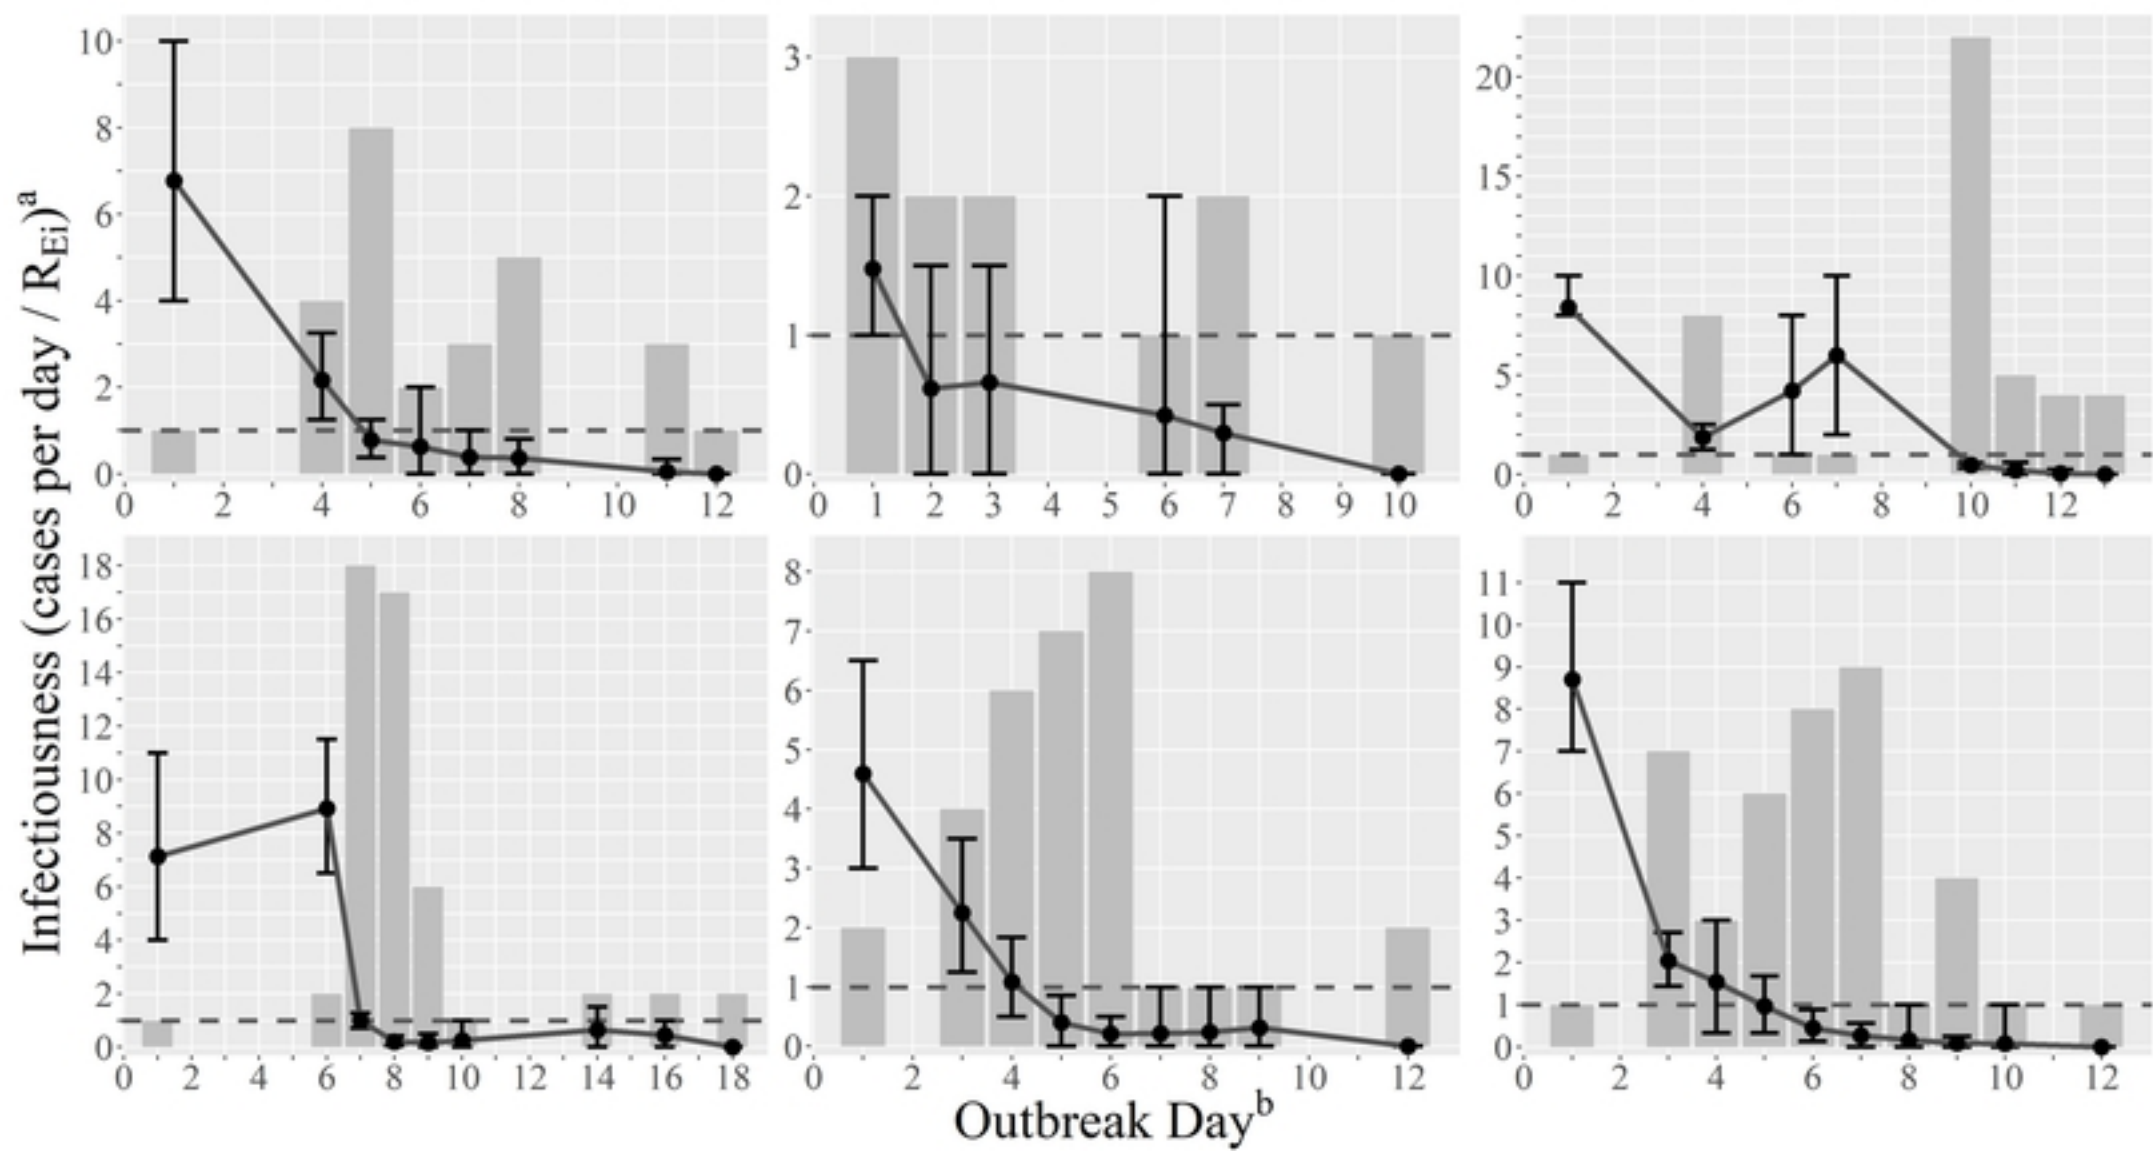

Figure 1

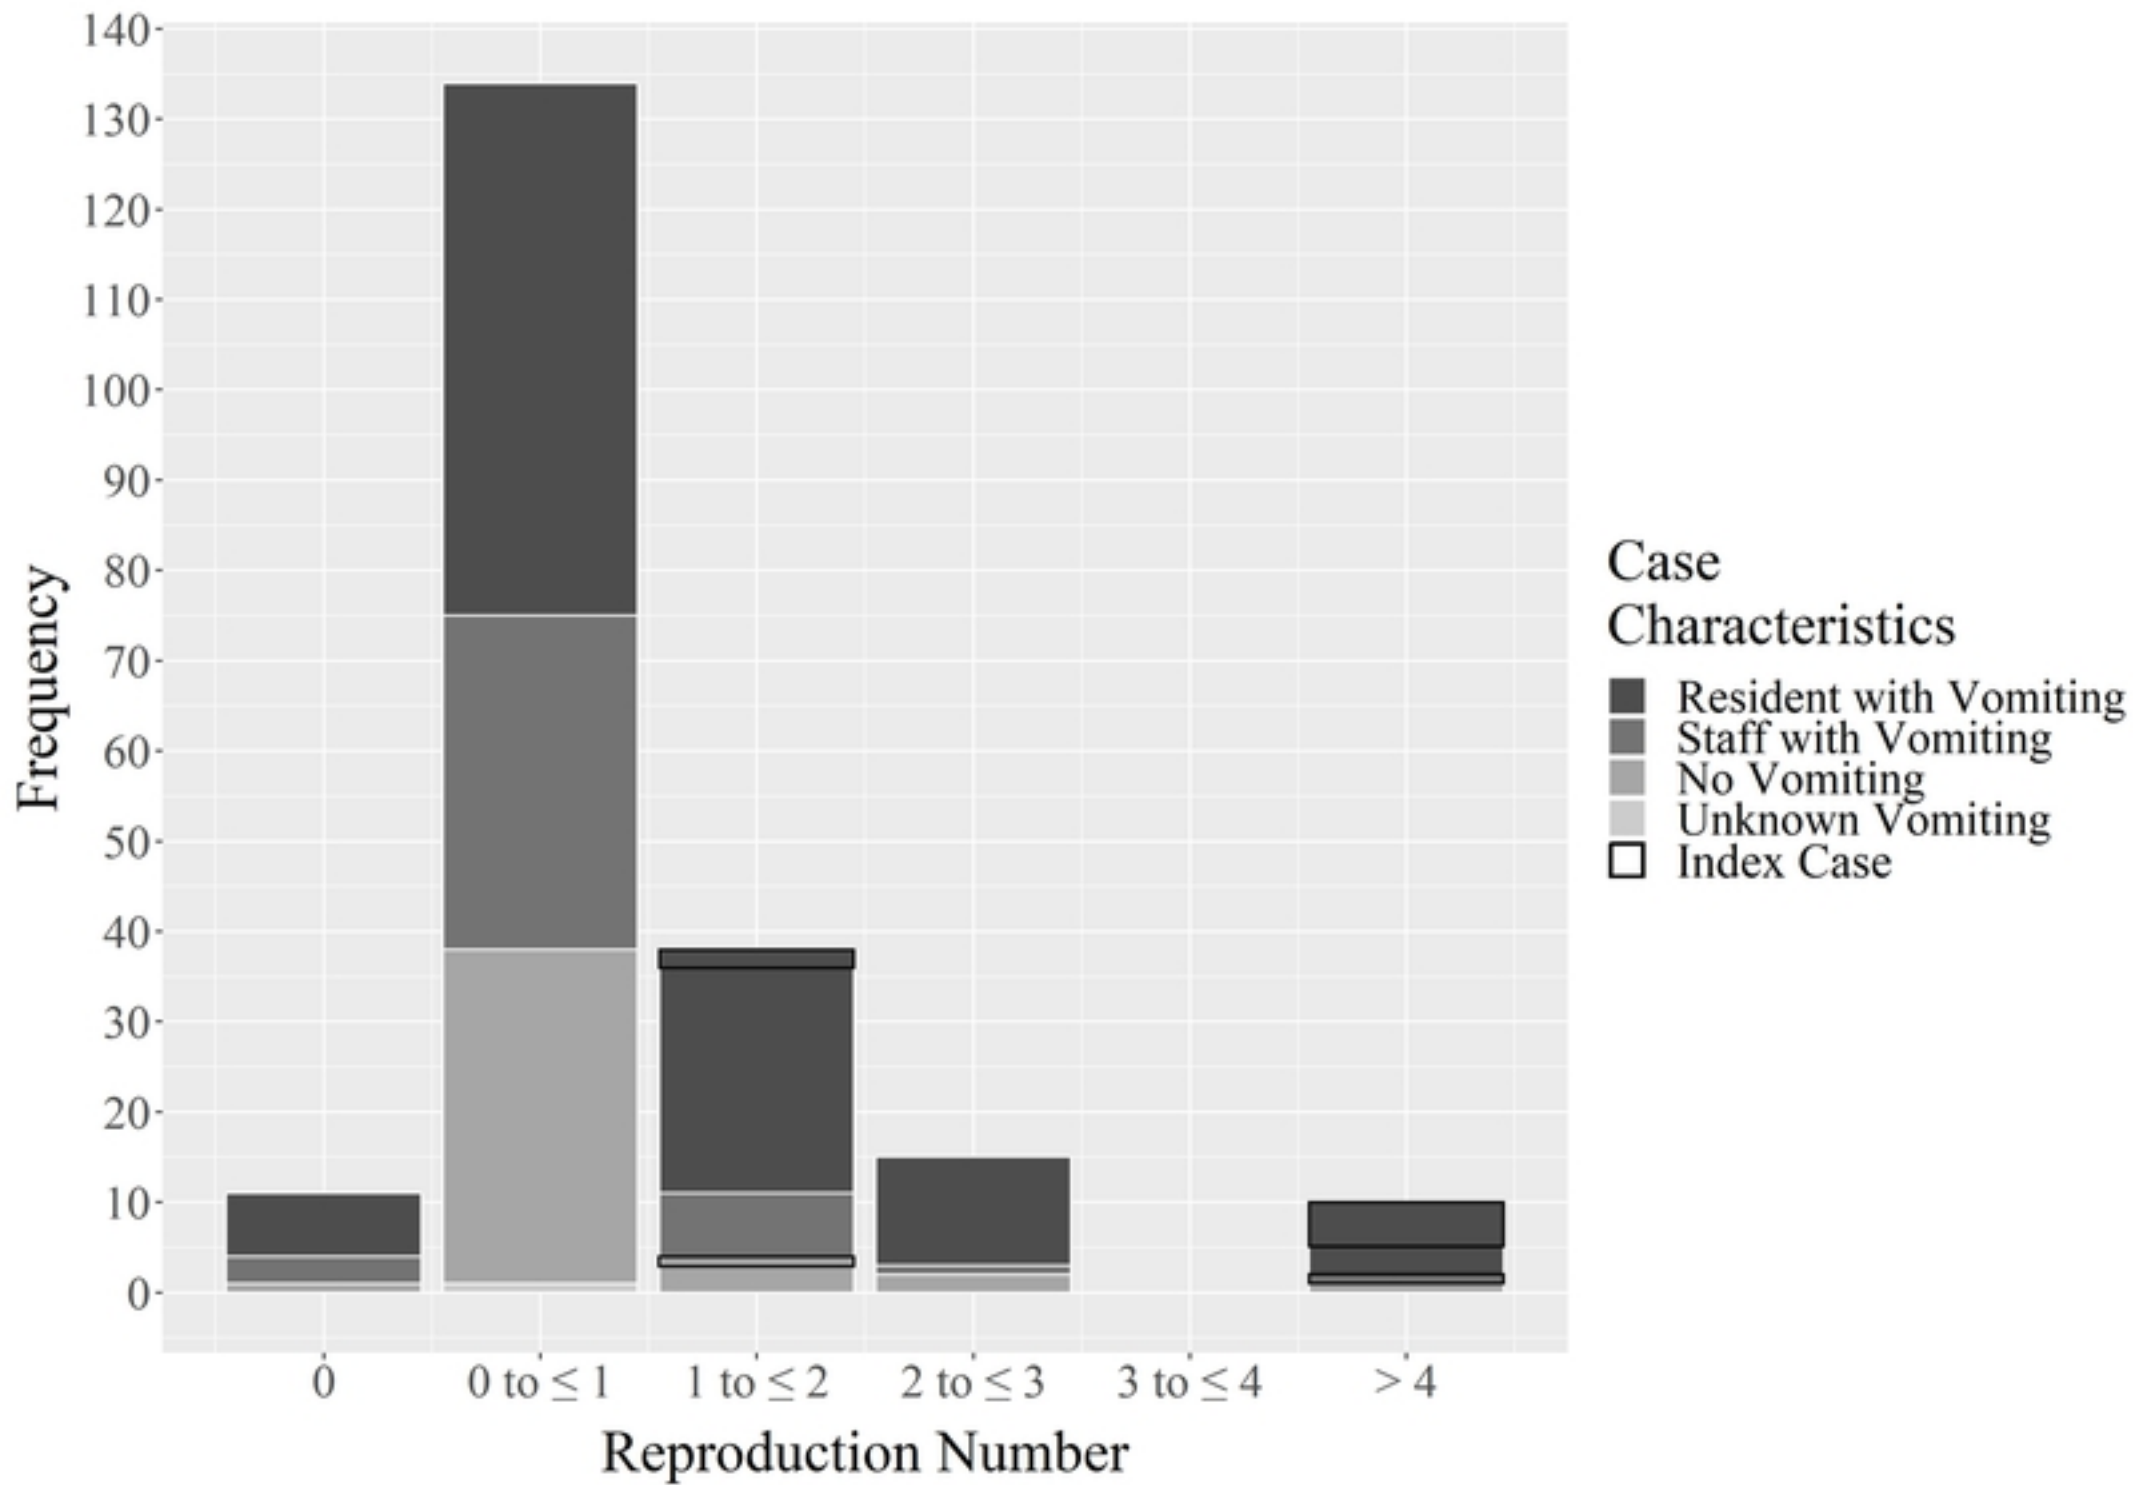

Figure 2



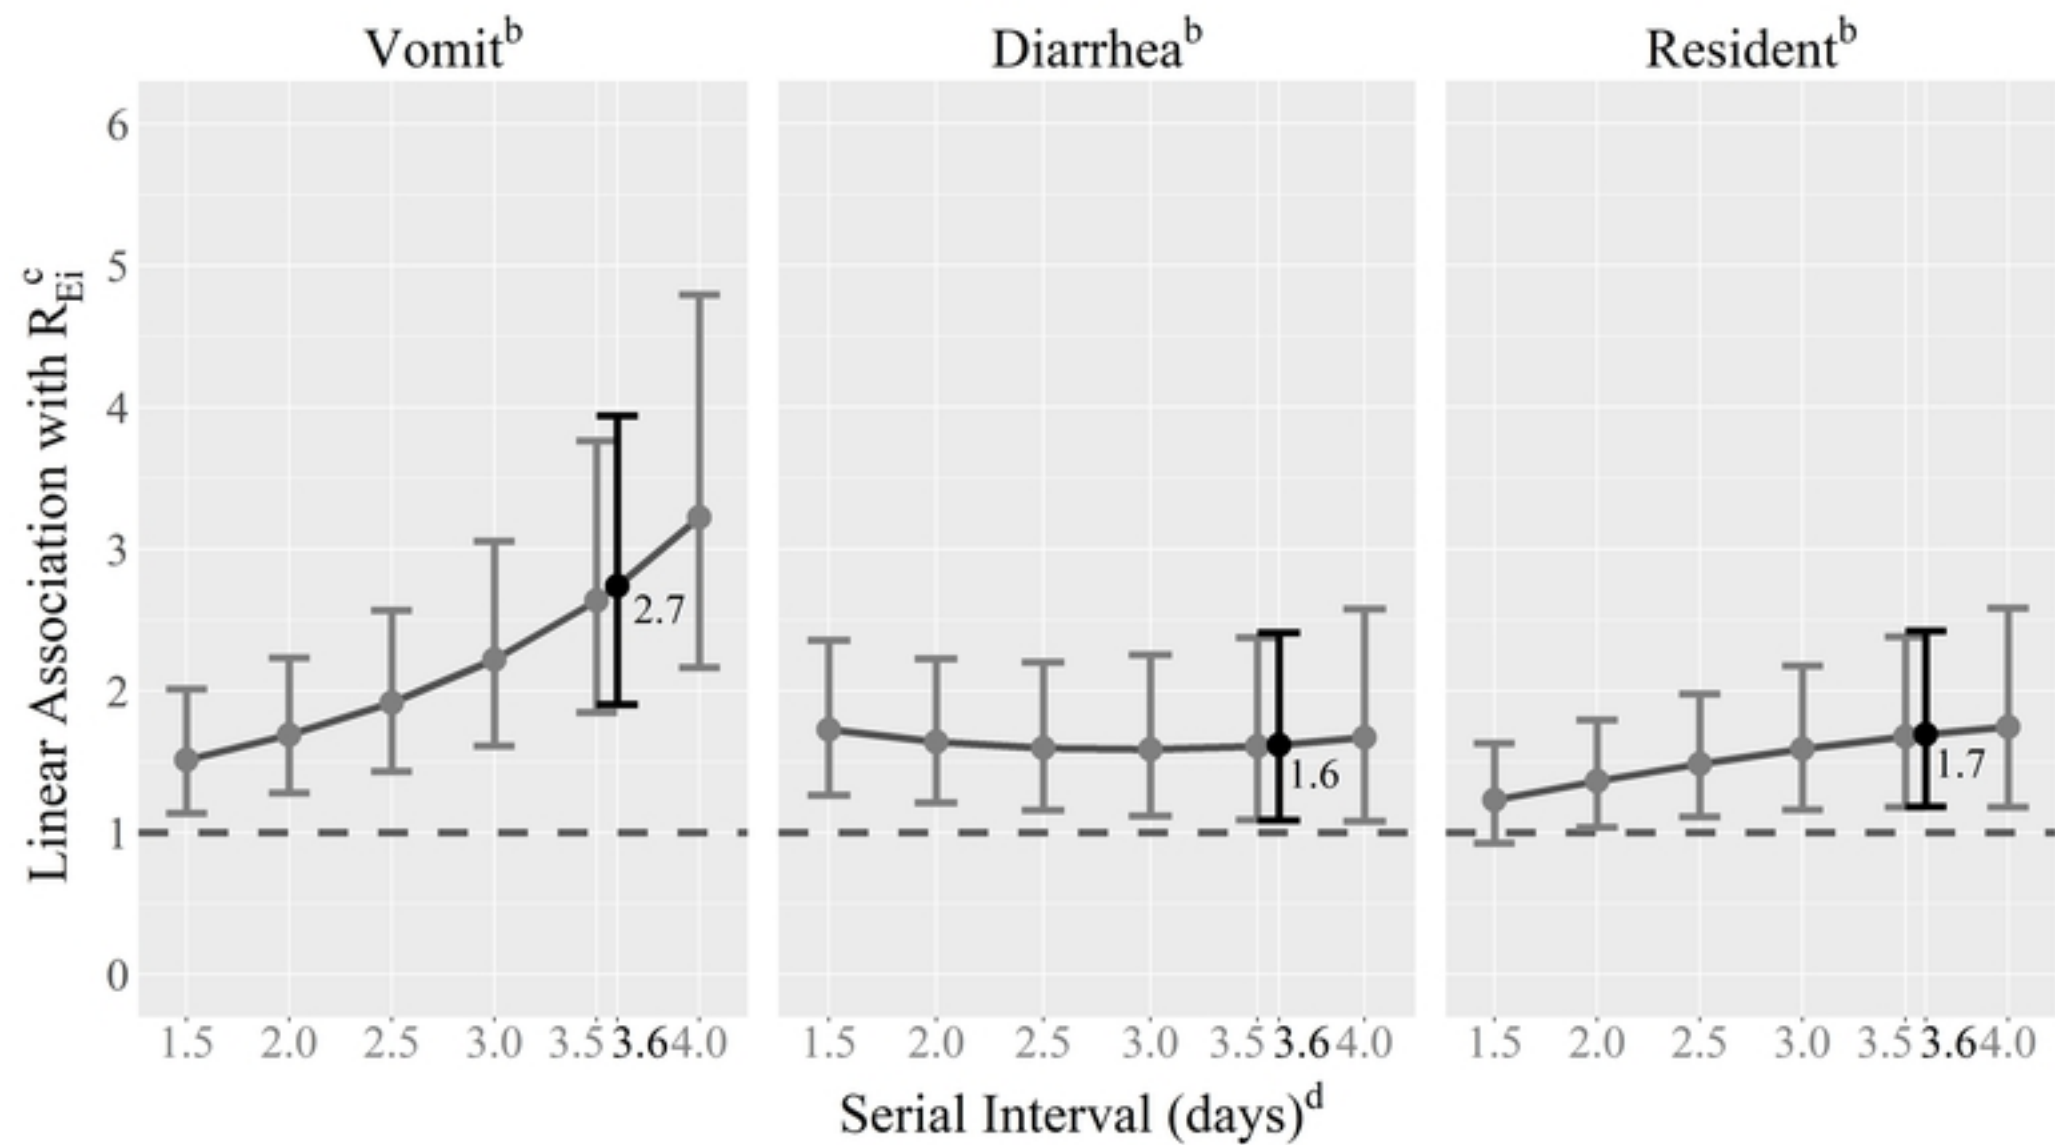

Figure 3
